# Supplementary material for: Influence of Casein kinase II inhibitor CX-4945 on BCL6-mediated apoptotic signaling in B-ALL in vitro and in vivo
Source: PubMed Central journal article supplement (PMC7057698; doi:10.1186/s12885-020-6650-9), 2020-03-04
Supplement: 12885_2020_6650_MOESM8_ESM.pdf [file 12885_2020_6650_MOESM8_ESM.pdf]

Original Blots Figure 3b

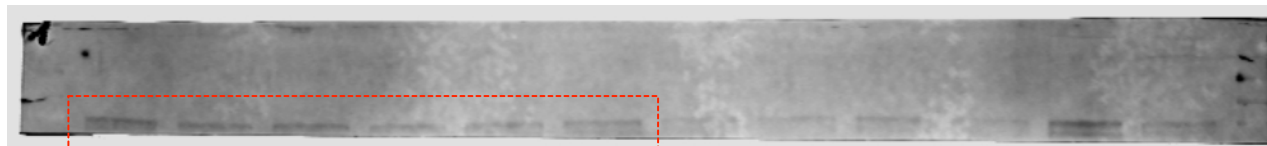

BACH2

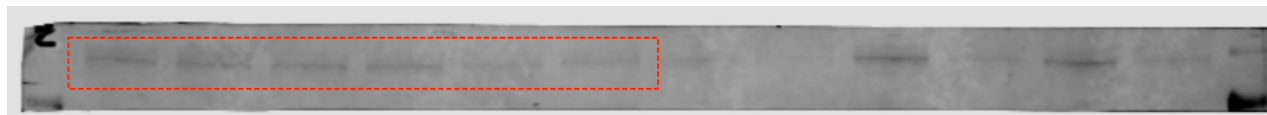

BCL6

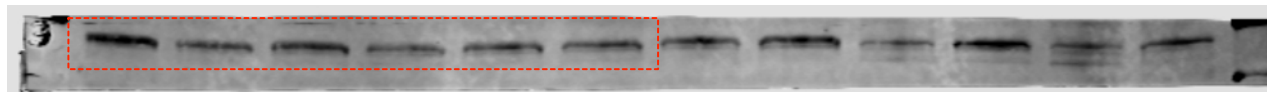

pAKT

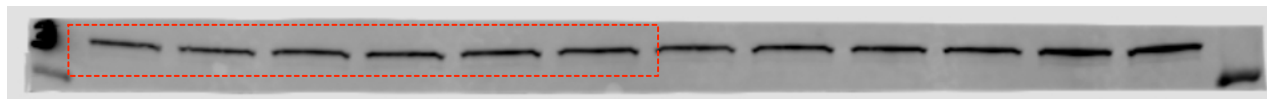

AKT

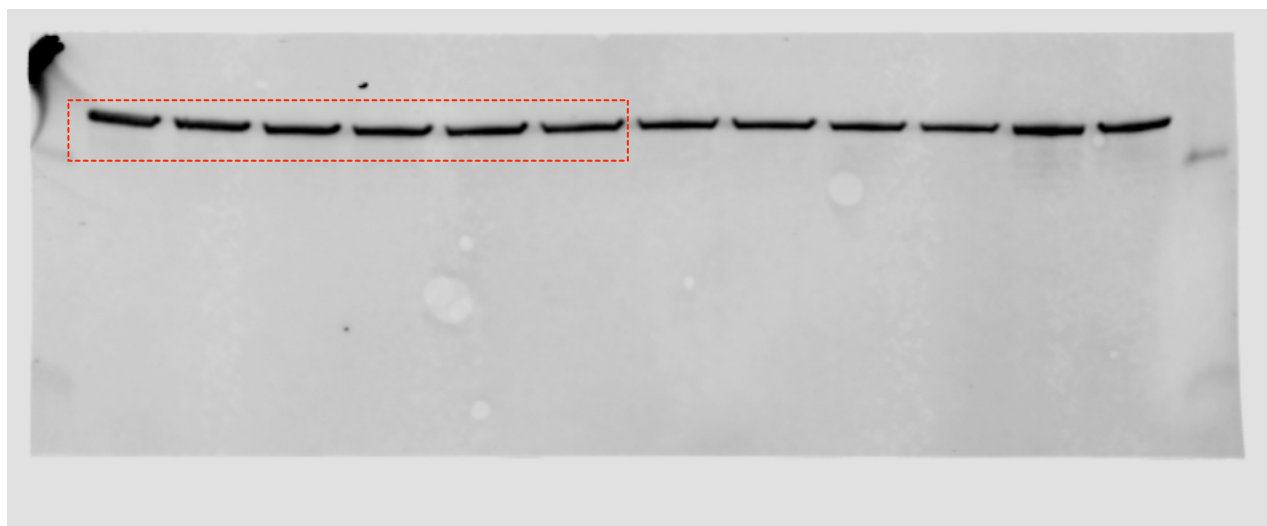

GAPDH

Original Blots Figure 3c

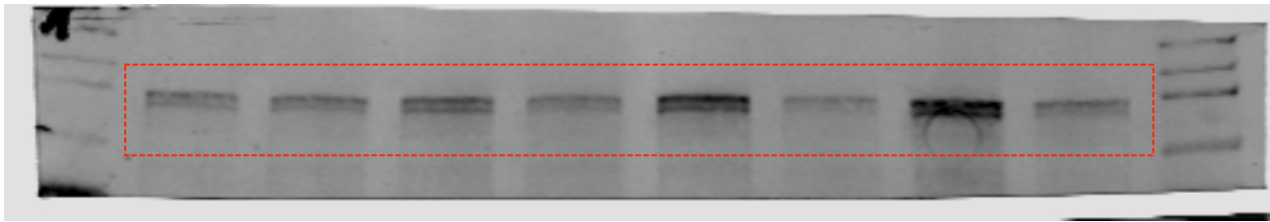

BACH2

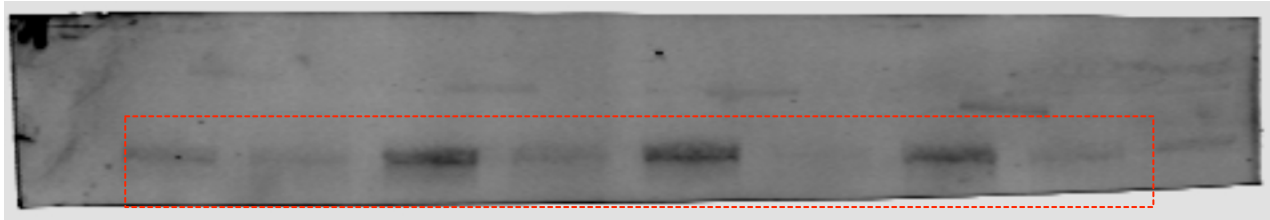

BCL6

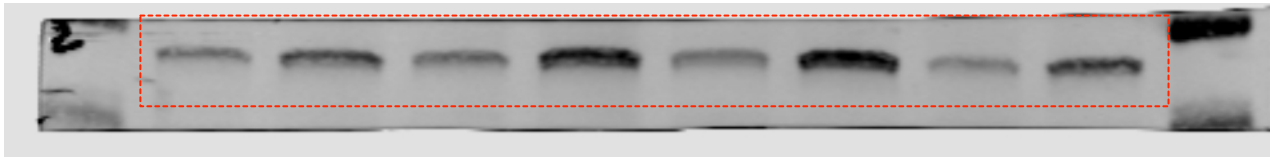

pAKT

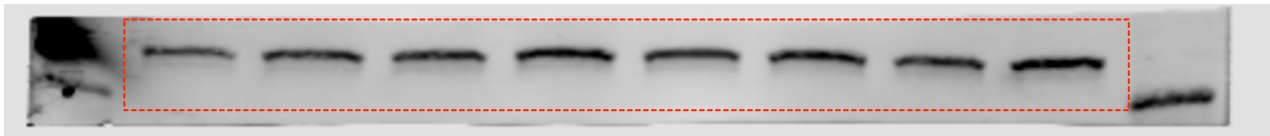

AKT

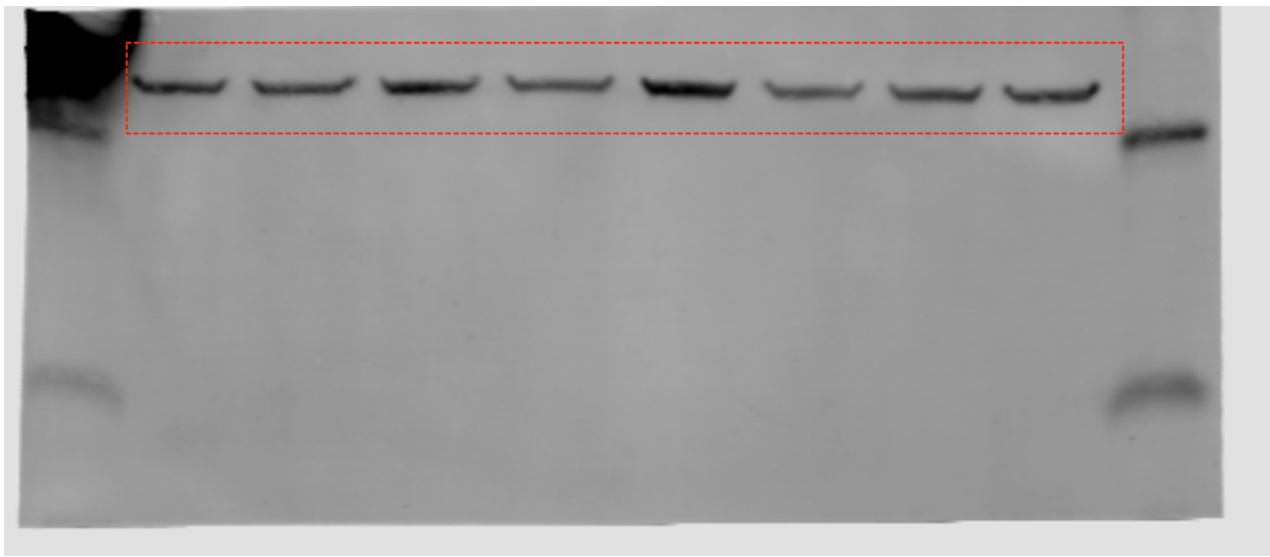

GAPDH

Original Blots Figure S2

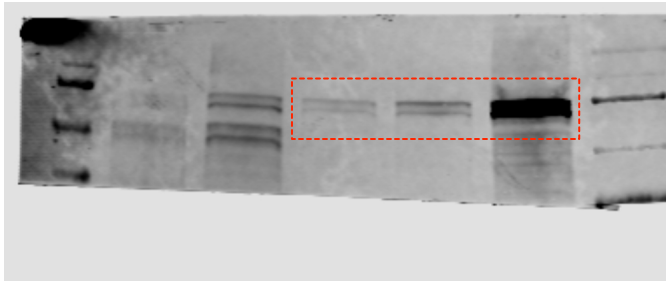

BACH2

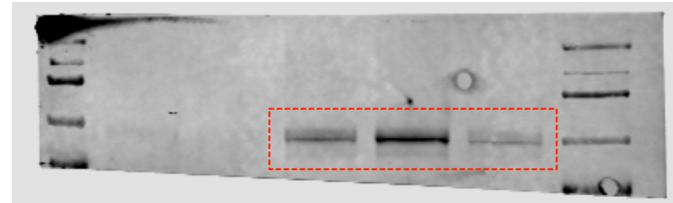

BCL6

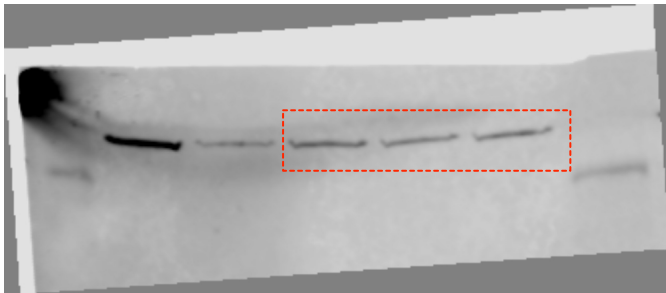

GAPDH

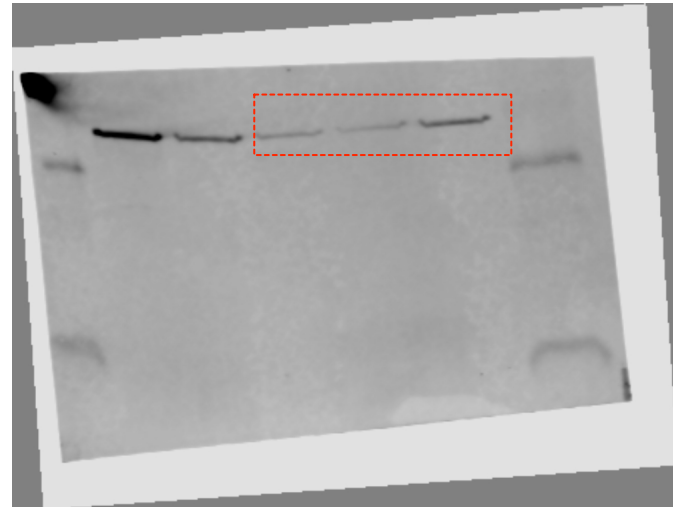

GAPDH

Original Blots Figure S3a

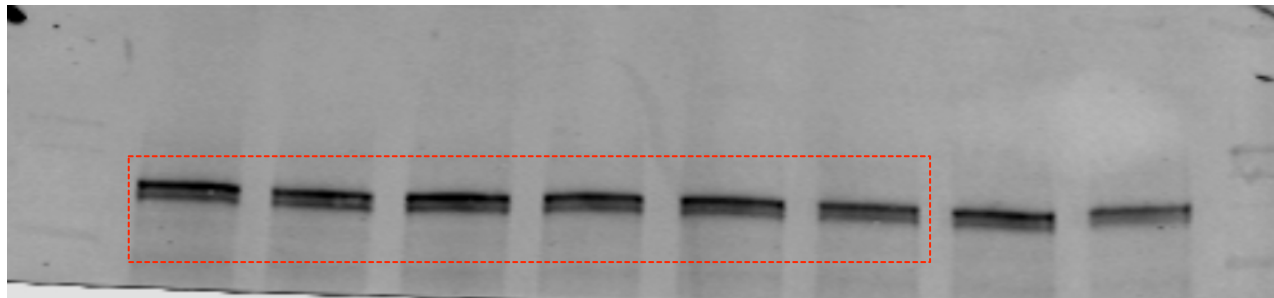

BACH2

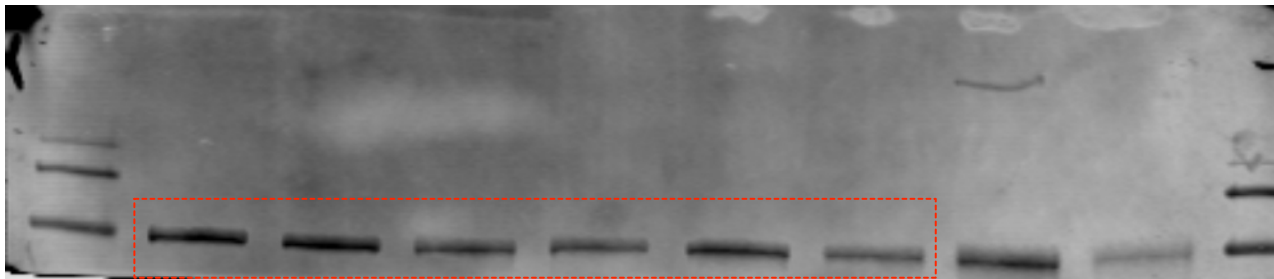

BCL6

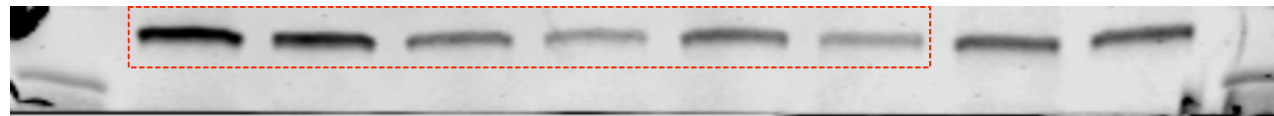

pAKT

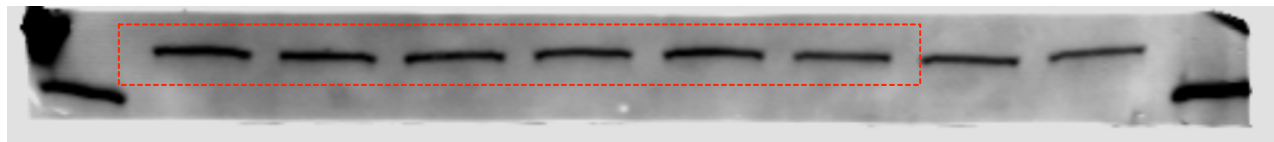

AKT

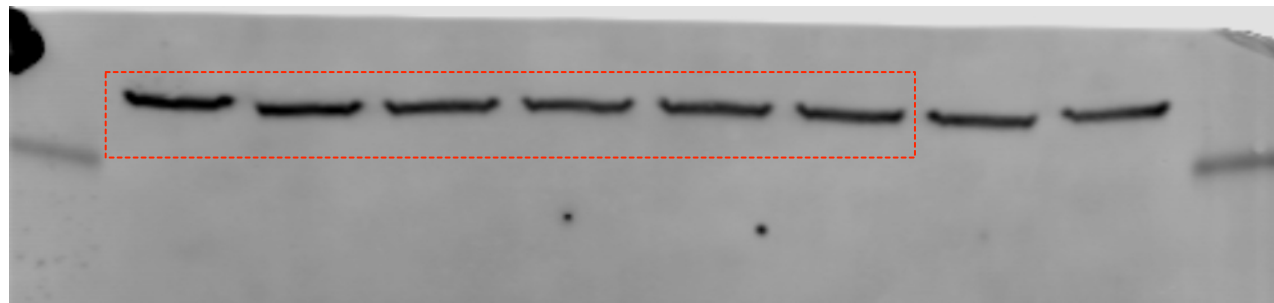

GAPDH

Original Blots Figure S3b

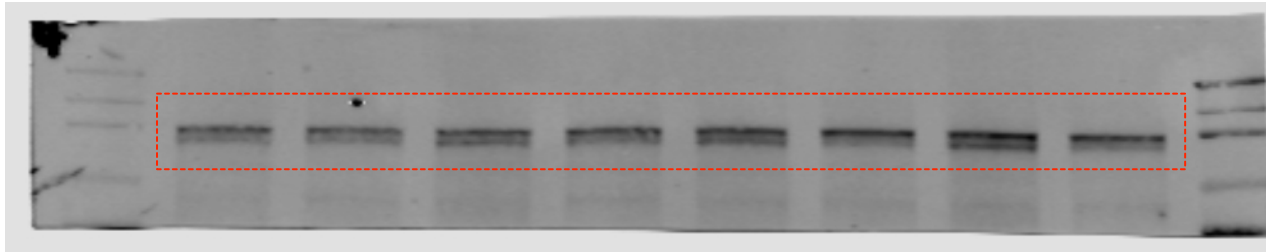

BACH2

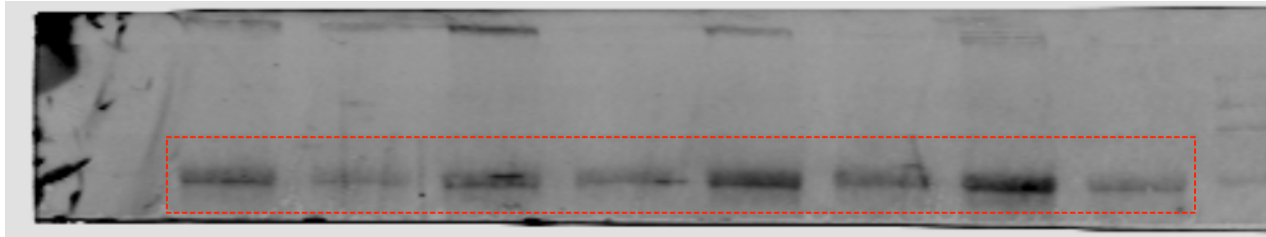

BCL6

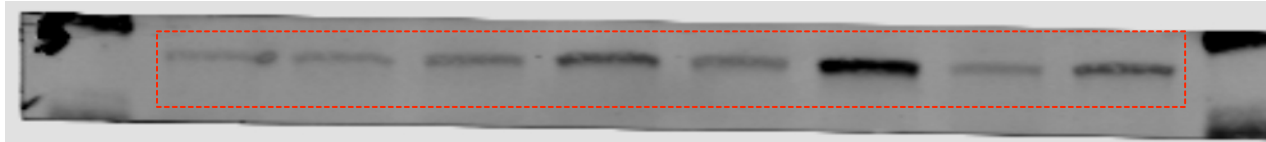

pAKT

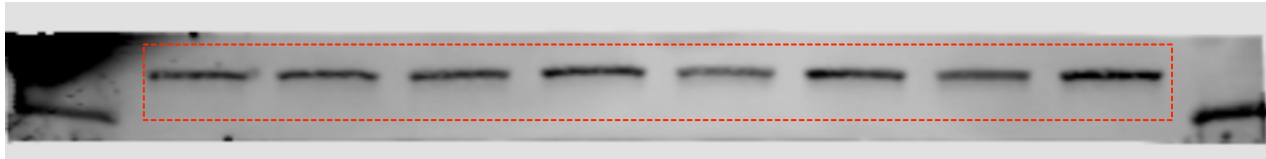

AKT

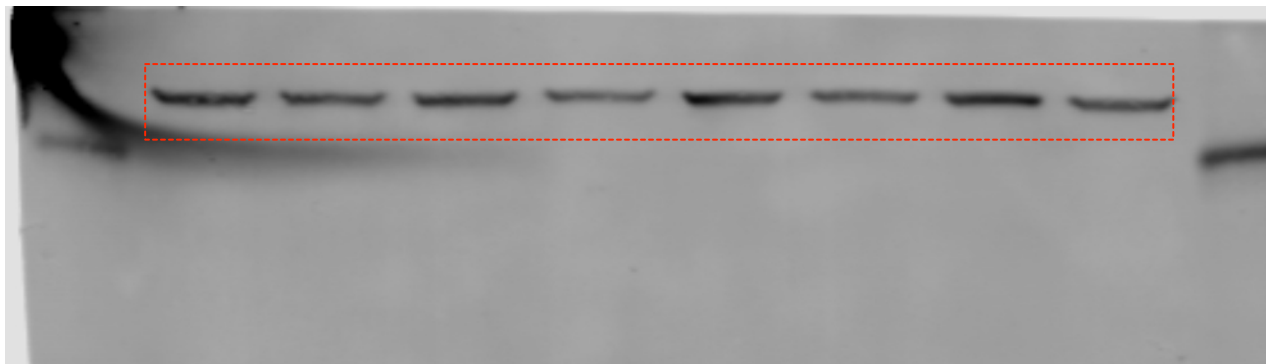

GAPDH

Original Blots Figure S3c

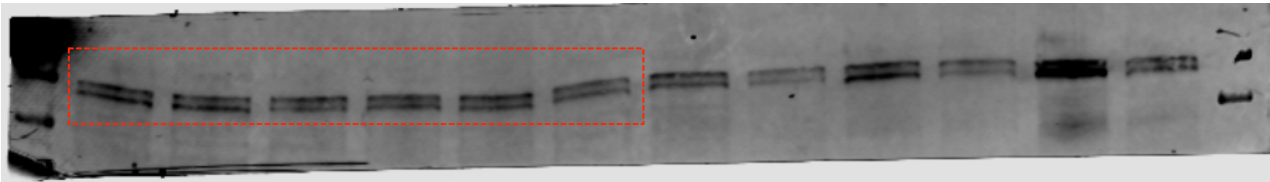

BACH2

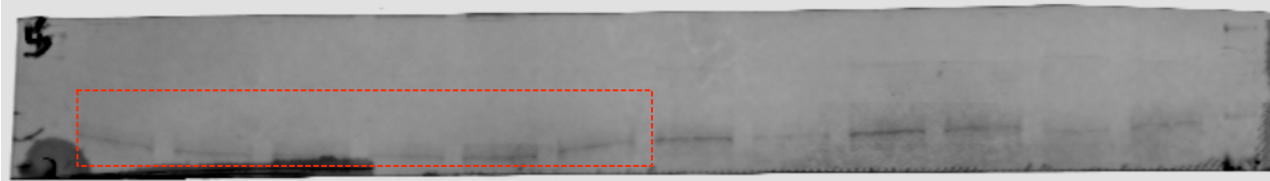

BCL6

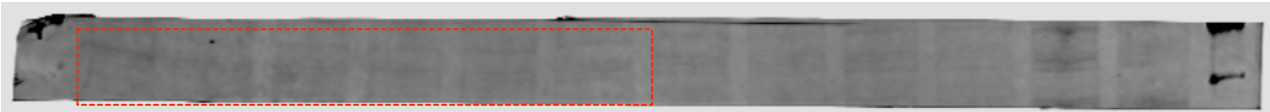

pAKT

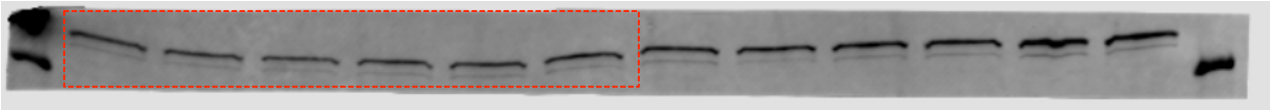

AKT

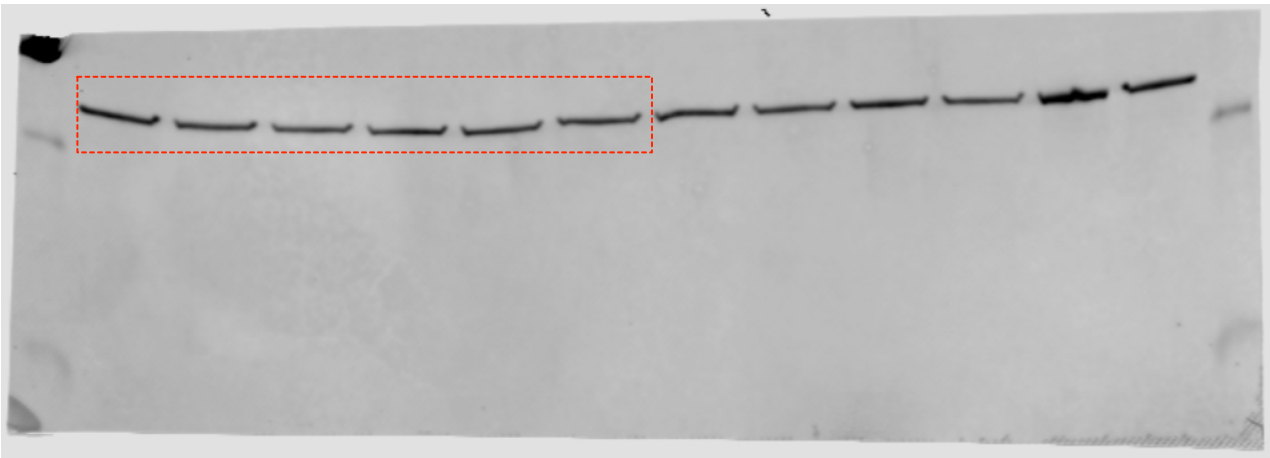

GAPDH

Original Blots Figure S3d

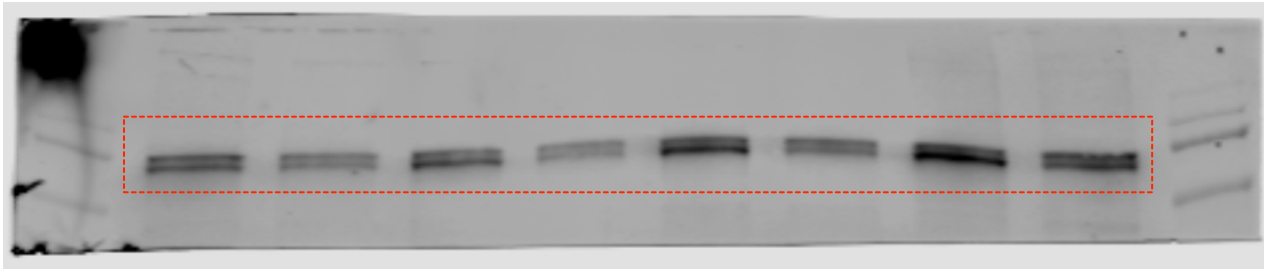

BACH2

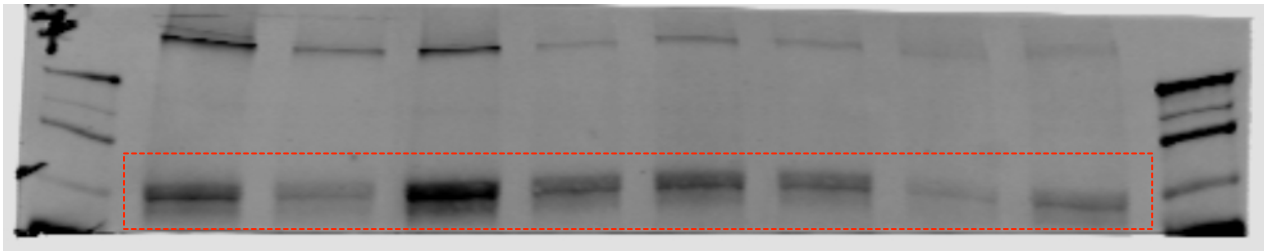

BCL6

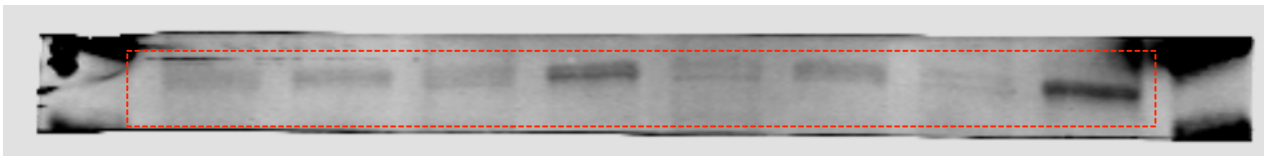

pAKT

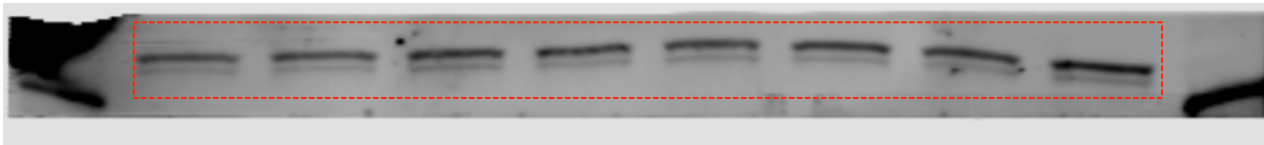

AKT

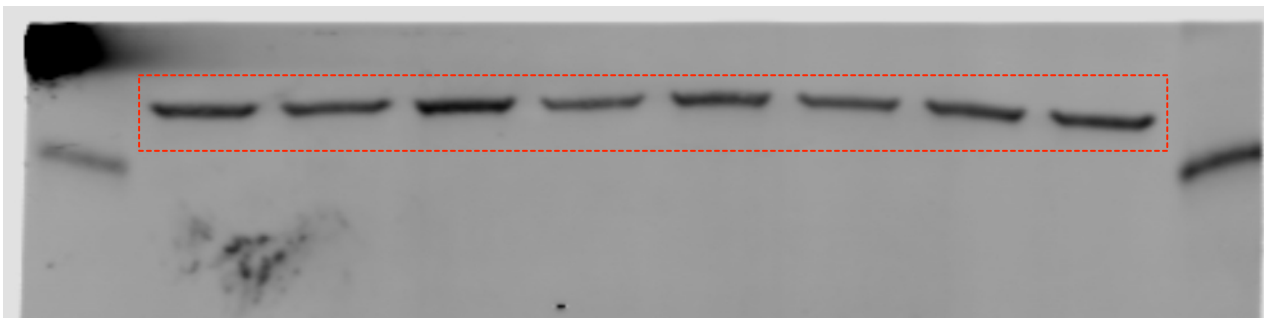

GAPDH
